# Supplementary figures and images for: The different effects of psyllium husk and orlistat on weight control, the amelioration of hypercholesterolemia and non-alcohol fatty liver disease in obese mice induced by a high-fat diet
Source: Royal Society of Chemistry journal article supplement (doi:10.1039/d2fo01161a), 2022-01-01

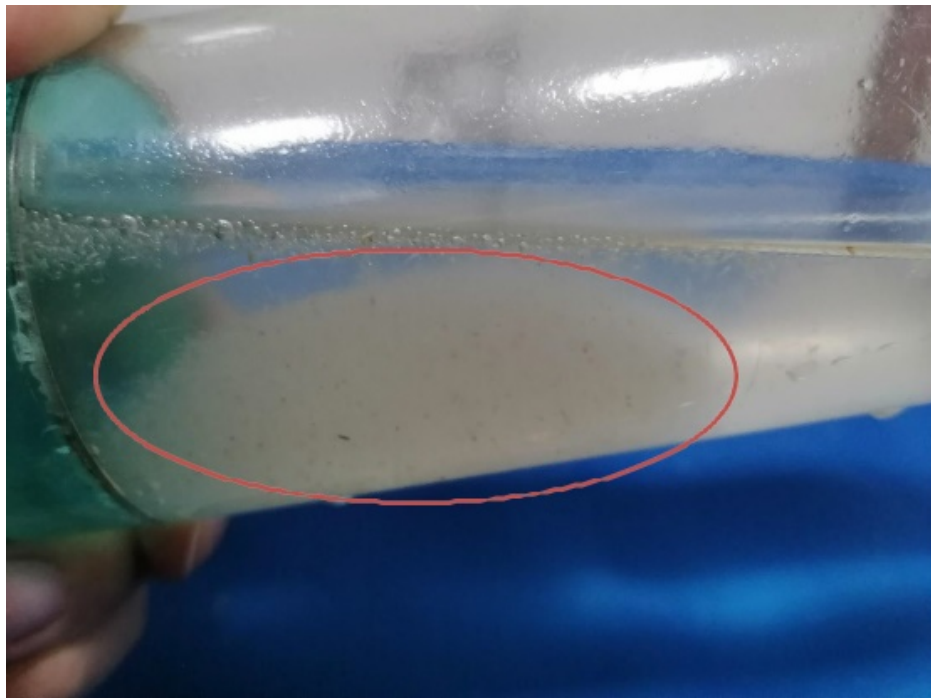

Supplement: d2fo01161a3.pdf [file d2fo01161a3.pdf]
